# Supplementary material for: A new Amazonian species of Allobates Zimmermann & Zimmermann, 1988 (Aromobatidae) with a trilled advertisement call
Source: PeerJ. 2022 Mar 7;10:e13026. doi: 10.7717/peerj.13026 (PMC8908894; doi:10.7717/peerj.13026)
Supplement: Supplemental Information 1 — Valuers are in %. GenBank accession numbers follow the taxa names. [file peerj-10-13026-s001.xls]

## Sheet: All_sequences
Supplemental Table S1. Uncorrected (p-distance) sequence divergence of 186 nucleotide sequences of Allobates available in GenBank (n = 183) and newly generated (3). Valuers are in %. GenBank accession numbers are giving after the taxa names.
		1	2	3	4	5	6	7	8	9	10	11	12	13	14	15	16	17	18	19	20	21	22	23	24	25	26	27	28	29	30	31	32	33	34	35	36	37	38	39	40	41	42	43	44	45	46	47	48
1	A. aff. conspicuus/subfolionidificans MT524113
2	A. aff. conspicuus/subfolionidificans MT524114	0.3
3	A. aff. conspicuus/subfolionidificans MT524138	1.7	1.4
4	A. conspicuus DQ502134	2.0	1.7	0.3
5	A. conspicuus DQ502135	2.3	2.0	0.6	0.3
6	A. conspicuus MT627186	2.3	2.5	2.5	2.8	3.1
7	A. subfolionidificans KF250492	2.0	2.3	2.3	2.5	2.8	2.5
8	A. subfolionidificans KF250493	2.0	2.3	2.3	2.5	2.8	2.5	0.0
9	A. aff. insperatus/juami MT524120	11.9	11.6	12.2	12.1	12.1	12.5	12.1	12.1
10	A. insperatus AY364557	12.5	12.2	12.7	12.7	12.7	13.0	12.7	12.7	0.8
11	A. insperatus HQ290959	12.5	12.2	12.7	12.7	12.7	13.0	12.7	12.7	0.8	0.0
12	A. juami MG243348	11.3	11.0	11.0	11.3	11.3	11.9	11.6	11.6	3.1	3.4	3.4
13	A. juami MG243349	11.3	11.0	11.0	11.3	11.3	11.9	11.6	11.6	3.1	3.4	3.4	0.0
14	A. juami MG243350	11.3	11.0	11.0	11.3	11.3	11.9	11.6	11.6	3.1	3.4	3.4	0.0	0.0
15	A. sp. Alto Mazan MF624185	11.6	11.3	12.2	12.1	12.1	12.5	12.1	12.1	2.8	3.1	3.1	2.5	2.5	2.5
16	A. aff. insperatus/juami MT524121	11.6	11.3	11.9	11.9	11.9	12.2	12.1	12.1	6.2	6.5	6.5	6.2	6.2	6.2	5.3
17	A. aff. insperatus/juami MT524122	11.6	11.3	11.6	11.6	11.6	11.9	11.3	11.3	6.7	7.0	7.0	6.2	6.2	6.2	5.6	5.1
18	A. insperatus MT627193	11.3	11.0	11.0	11.0	11.0	12.2	11.3	11.3	6.2	6.8	6.8	5.6	5.6	5.6	5.4	4.8	2.3
19	A. marchesianus AF128583	11.2	10.9	11.7	12.0	12.0	11.7	12.0	12.0	6.3	6.8	6.8	6.3	6.3	6.3	5.7	2.6	6.0	5.4
20	A. amissibilis MT524118	12.7	12.5	12.7	13.3	13.0	12.7	13.6	13.6	15.4	15.2	15.2	14.3	14.3	14.3	14.0	12.6	12.9	12.7	13.7
21	A. amissibilis MT524150	12.7	12.5	12.7	13.3	13.0	12.7	13.6	13.6	15.4	15.2	15.2	14.3	14.3	14.3	14.0	12.6	12.9	12.7	13.7	0.0
22	A. amissibilis MT627204	12.7	12.5	12.7	13.3	13.0	12.7	13.6	13.6	15.4	15.2	15.2	14.3	14.3	14.3	14.0	12.6	12.9	12.7	13.7	0.0	0.0
23	A. sp. KC520680	12.7	12.5	12.7	13.3	13.0	12.7	13.6	13.6	15.4	15.2	15.2	14.3	14.3	14.3	14.0	12.6	12.9	12.7	13.7	0.0	0.0	0.0
24	A. aff. femoralis/hodli MT524110	10.7	11.0	11.9	12.2	12.2	12.2	11.3	11.3	13.6	14.2	14.2	13.3	13.3	13.3	13.0	13.9	13.0	14.2	14.5	13.6	13.6	13.6	13.6
25	A. aff. femoralis/hodli MT524115	11.3	11.6	12.5	12.8	12.8	12.8	11.9	11.9	14.2	14.2	14.2	13.9	13.9	13.9	13.6	14.5	13.6	14.7	15.0	13.6	13.6	13.6	13.6	0.6
26	A. femoralis AF124106	11.3	11.6	12.2	12.5	12.5	12.5	11.6	11.6	13.6	13.6	13.6	12.7	12.7	12.7	12.7	13.6	12.4	13.9	14.2	12.1	12.1	12.1	12.1	1.4	1.4
27	A. myersi MG252614	11.9	11.6	12.5	12.8	12.8	13.3	12.5	12.5	13.6	13.6	13.6	13.3	13.3	13.3	13.6	13.9	13.0	14.2	14.5	14.2	14.2	14.2	14.2	2.3	2.3	2.6
28	A. aff. femoralis/hodli MT524117	11.2	11.0	11.8	12.4	12.4	12.7	12.1	12.1	13.8	13.8	13.8	13.5	13.5	13.5	13.2	14.0	13.2	13.8	14.7	13.2	13.2	13.2	13.2	2.3	2.3	2.9	3.5
29	A. femoralis AY326026	11.8	11.5	11.8	12.3	12.3	11.2	11.7	11.7	13.1	13.1	13.1	12.0	12.0	12.0	11.7	13.1	12.0	13.2	13.8	9.7	9.7	9.7	9.7	6.4	6.4	4.9	7.0	5.7
30	A. femoralis AY326027	11.8	11.5	11.8	12.4	12.4	11.2	11.8	11.8	13.2	13.2	13.2	12.0	12.0	12.0	11.7	13.2	12.0	13.2	13.5	9.7	9.7	9.7	9.7	6.4	6.4	4.9	7.0	5.8	0.0
31	A. hodli KX044279	11.2	11.5	12.4	12.9	12.9	12.1	12.0	12.0	12.3	12.3	12.3	12.6	12.6	12.6	11.7	12.9	12.0	12.6	13.5	10.6	10.6	10.6	10.6	5.8	5.8	5.2	7.0	5.5	2.3	2.3
32	A. hodli KX044280	11.2	11.5	12.4	12.9	12.9	12.1	12.0	12.0	12.3	12.3	12.3	12.6	12.6	12.6	11.7	12.9	12.0	12.6	13.5	10.6	10.6	10.6	10.6	5.8	5.8	5.2	7.0	5.5	2.3	2.3	0.0
33	A. hodli KX044281	11.2	11.5	12.4	12.9	12.9	12.1	12.0	12.0	12.3	12.3	12.3	12.6	12.6	12.6	11.7	12.9	12.0	12.6	13.5	10.6	10.6	10.6	10.6	5.8	5.8	5.2	7.0	5.5	2.3	2.3	0.0	0.0
34	A. zaparo EU342530	13.0	12.8	13.0	13.3	13.3	13.9	12.5	12.5	14.2	14.7	14.7	13.3	13.3	13.3	14.2	13.6	13.9	13.9	14.5	13.9	13.9	13.9	13.9	5.7	6.3	6.6	6.1	6.4	7.5	7.6	7.5	7.5	7.5
35	A. zaparo HQ291003	13.3	13.0	13.3	13.6	13.6	13.6	12.8	12.8	14.5	15.0	15.0	13.6	13.6	13.6	14.5	13.9	14.2	14.2	14.7	13.6	13.6	13.6	13.6	6.0	6.0	6.9	6.3	6.6	7.2	7.3	7.8	7.8	7.8	0.9
36	A. zaparo EU342531	13.0	12.8	13.6	13.9	13.9	13.9	12.5	12.5	14.2	14.7	14.7	13.9	13.9	13.9	14.2	13.6	13.9	14.5	14.2	14.2	14.2	14.2	14.2	6.0	6.6	6.9	6.3	6.4	7.5	7.6	7.5	7.5	7.5	1.4	1.7
37	A. aff. magnussoni MT627173	12.3	12.0	12.8	13.4	13.4	12.8	13.4	13.4	14.4	14.2	14.2	14.2	14.2	14.2	14.4	14.2	12.5	12.5	14.3	10.6	10.6	10.6	10.6	12.2	12.2	11.6	11.9	12.1	11.2	11.2	11.2	11.2	11.2	12.5	13.0	12.8
38	A. brunneus DQ502047	11.7	11.5	12.3	12.9	12.9	12.3	13.4	13.4	14.5	13.7	13.7	13.7	13.7	13.7	14.5	13.7	12.8	12.9	13.8	10.4	10.4	10.4	10.4	12.8	12.8	12.2	12.5	12.7	11.5	11.6	11.5	11.5	11.5	13.1	13.7	13.4	3.1
39	A. brunneus DQ502132	11.7	11.5	12.3	12.9	12.9	12.3	13.4	13.4	14.5	13.7	13.7	13.7	13.7	13.7	14.5	13.7	12.8	12.9	13.8	10.4	10.4	10.4	10.4	13.1	13.1	12.5	12.8	13.0	11.5	11.6	11.5	11.5	11.5	13.4	14.0	13.7	2.8	0.3
40	A. brunneus DQ502133	11.7	11.5	12.3	12.9	12.9	12.3	13.4	13.4	14.5	13.7	13.7	13.7	13.7	13.7	14.5	13.7	12.8	12.9	13.8	10.4	10.4	10.4	10.4	13.1	13.1	12.5	12.8	13.0	11.5	11.6	11.5	11.5	11.5	13.4	14.0	13.7	2.8	0.3	0.0
41	A. magnussoni MT627184	12.0	11.7	12.6	13.1	13.1	12.6	13.7	13.7	14.8	14.0	14.0	14.0	14.0	14.0	14.8	14.0	13.1	13.2	14.1	10.4	10.4	10.4	10.4	12.8	12.8	12.2	12.5	12.7	11.2	11.3	11.2	11.2	11.2	13.1	13.7	13.4	3.1	0.6	0.3	0.3
42	A. sp. PIS-2014a KJ747328	11.7	11.7	12.6	13.1	13.1	12.3	13.4	13.4	14.8	14.0	14.0	14.0	14.0	14.0	14.8	14.0	13.1	13.2	14.1	10.7	10.7	10.7	10.7	13.1	13.1	12.5	13.1	13.3	11.8	11.8	11.5	11.5	11.5	13.7	14.3	14.0	3.1	0.6	0.3	0.3	0.6
43	A. sp. PIS-2014a KJ747329	11.7	11.7	12.6	13.1	13.1	12.3	13.4	13.4	14.8	14.0	14.0	14.0	14.0	14.0	14.8	14.0	13.1	13.2	14.1	10.7	10.7	10.7	10.7	13.1	13.1	12.5	13.1	13.3	11.8	11.8	11.5	11.5	11.5	13.7	14.3	14.0	3.1	0.6	0.3	0.3	0.6	0.0
44	A. sp. PIS-2014a KJ747330	11.7	11.7	12.6	13.1	13.1	12.3	13.4	13.4	14.8	14.0	14.0	14.0	14.0	14.0	14.8	14.0	13.1	13.2	14.1	10.7	10.7	10.7	10.7	13.1	13.1	12.5	13.1	13.3	11.8	11.8	11.5	11.5	11.5	13.7	14.3	14.0	3.1	0.6	0.3	0.3	0.6	0.0	0.0
45	A. flaviventris KY886567	12.8	12.5	12.8	13.4	13.4	13.1	13.4	13.4	14.4	14.4	14.4	13.9	13.9	13.9	14.7	13.6	13.6	13.7	13.8	12.3	12.3	12.3	12.3	13.6	13.9	13.0	13.6	14.4	13.5	13.5	13.8	13.8	13.8	13.6	14.2	13.9	6.4	6.8	6.5	6.5	6.8	6.8	6.8	6.8
46	A. flaviventris KY886568	12.5	12.3	12.5	13.1	13.1	12.8	13.1	13.1	14.2	14.2	14.2	13.6	13.6	13.6	14.4	13.3	13.3	13.4	13.5	12.6	12.6	12.6	12.6	13.3	13.6	12.8	13.3	14.1	13.8	13.8	14.0	14.0	14.0	13.3	13.9	13.6	6.7	7.0	6.8	6.8	7.0	7.0	7.0	7.0	0.3
47	A. flaviventris KY886569	12.5	12.3	13.7	14.2	14.2	14.0	13.9	13.9	14.7	14.7	14.7	14.2	14.2	14.2	14.7	13.3	13.6	13.4	13.2	12.3	12.3	12.3	12.3	13.9	14.2	13.6	13.9	14.7	14.0	14.1	14.0	14.0	14.0	14.2	14.8	14.5	6.7	7.0	6.8	6.8	7.0	7.0	7.0	7.0	1.4	1.7
48	A. crombiei KF250508	12.6	12.3	12.0	12.5	12.5	12.3	13.1	13.1	14.2	13.9	13.9	12.5	12.5	12.5	13.6	13.6	12.5	12.6	14.1	11.5	11.5	11.5	11.5	11.6	12.2	11.3	12.5	12.4	10.9	11.0	11.8	11.8	11.8	12.2	11.9	12.8	8.1	9.6	9.3	9.3	9.6	9.6	9.6	9.6	9.8	10.1	10.4
49	A. crombiei KF250509	12.6	12.3	12.0	12.5	12.5	12.3	13.1	13.1	14.2	13.9	13.9	12.5	12.5	12.5	13.6	13.6	12.5	12.6	14.1	11.5	11.5	11.5	11.5	11.6	12.2	11.3	12.5	12.4	10.9	11.0	11.8	11.8	11.8	12.2	11.9	12.8	8.1	9.6	9.3	9.3	9.6	9.6	9.6	9.6	9.8	10.1	10.4	0.0
50	A. crombiei KJ747342	12.9	12.6	12.3	12.8	12.8	12.6	13.4	13.4	15.1	14.2	14.2	13.4	13.4	13.4	14.5	14.5	13.4	13.4	14.9	11.2	11.2	11.2	11.2	11.9	11.9	11.0	12.2	12.1	10.6	10.7	11.5	11.5	11.5	12.5	12.2	13.1	7.9	9.3	9.0	9.0	9.3	9.3	9.3	9.3	9.8	10.1	10.7	0.8
51	A. carajas MK060055	12.6	12.3	12.0	12.6	12.6	12.3	12.6	12.6	13.6	12.8	12.8	11.9	11.9	11.9	12.2	12.8	12.8	12.0	13.2	10.7	10.7	10.7	10.7	12.5	12.5	11.6	13.1	12.1	10.3	10.4	11.2	11.2	11.2	13.4	13.1	14.0	10.1	10.2	10.2	10.2	10.5	10.5	10.5	10.5	11.0	11.3	11.8	6.8
52	A. carajas MK060056	12.6	12.3	12.0	12.6	12.6	12.3	12.6	12.6	13.6	12.8	12.8	11.9	11.9	11.9	12.2	12.8	12.8	12.0	13.2	10.7	10.7	10.7	10.7	12.5	12.5	11.6	13.1	12.1	10.3	10.4	11.2	11.2	11.2	13.4	13.1	14.0	10.1	10.2	10.2	10.2	10.5	10.5	10.5	10.5	11.0	11.3	11.8	6.8
53	A. carajas MK060057	12.6	12.3	12.0	12.6	12.6	12.3	12.6	12.6	13.6	12.8	12.8	11.9	11.9	11.9	12.2	12.8	12.8	12.0	13.2	10.7	10.7	10.7	10.7	12.5	12.5	11.6	13.1	12.1	10.3	10.4	11.2	11.2	11.2	13.4	13.1	14.0	10.1	10.2	10.2	10.2	10.5	10.5	10.5	10.5	11.0	11.3	11.8	6.8
54	A. sp. Carajas MG252610	12.6	12.3	12.0	12.6	12.6	12.3	12.6	12.6	13.6	12.8	12.8	11.9	11.9	11.9	12.2	12.8	12.8	12.0	13.2	10.7	10.7	10.7	10.7	12.5	12.5	11.6	13.1	12.1	10.3	10.4	11.2	11.2	11.2	13.4	13.1	14.0	10.1	10.2	10.2	10.2	10.5	10.5	10.5	10.5	11.0	11.3	11.8	6.8
55	A. sp. Carajas MG252611	12.6	12.3	12.0	12.6	12.6	12.3	12.6	12.6	13.6	12.8	12.8	11.9	11.9	11.9	12.2	12.8	12.8	12.0	13.2	10.7	10.7	10.7	10.7	12.5	12.5	11.6	13.1	12.1	10.3	10.4	11.2	11.2	11.2	13.4	13.1	14.0	10.1	10.2	10.2	10.2	10.5	10.5	10.5	10.5	11.0	11.3	11.8	6.8
56	A. sp. Carajas MF624180	12.3	12.0	11.7	12.2	12.2	12.0	12.2	12.2	13.3	12.4	12.4	11.6	11.6	11.6	11.9	13.0	13.0	12.2	12.9	10.9	10.9	10.9	10.9	12.1	12.1	11.3	12.7	11.7	10.0	10.0	10.9	10.9	10.9	13.0	12.7	13.6	10.4	10.7	10.7	10.7	11.0	11.0	11.0	11.0	11.2	11.5	12.0	7.0
57	A. goianus MT627207	12.0	11.7	12.0	12.5	12.5	12.0	13.1	13.1	13.9	13.0	13.0	12.5	12.5	12.5	13.6	13.9	12.7	12.8	12.6	9.5	9.5	9.5	9.5	12.2	12.2	10.7	12.2	12.1	9.2	9.2	10.0	10.0	10.0	12.8	12.5	13.3	10.4	10.2	10.2	10.2	10.5	10.5	10.5	10.5	11.5	11.8	11.5	6.8
58	A. niputidea KP149362	15.1	14.9	14.9	15.1	15.1	14.3	15.4	15.4	13.9	13.9	13.9	13.9	13.9	13.9	14.2	12.5	13.6	13.7	13.8	13.4	13.4	13.4	13.4	14.5	15.1	14.8	14.8	14.1	12.6	12.6	12.9	12.9	12.9	13.6	13.9	13.9	11.5	11.9	11.6	11.6	11.3	11.9	11.9	11.9	13.2	13.5	14.0	13.8
59	A. niputidea KP149439	15.1	14.9	14.9	15.1	15.1	14.3	15.4	15.4	13.9	13.9	13.9	13.9	13.9	13.9	14.2	12.5	13.6	13.7	13.8	13.4	13.4	13.4	13.4	14.5	15.1	14.8	14.8	14.1	12.6	12.6	12.9	12.9	12.9	13.6	13.9	13.9	11.5	11.9	11.6	11.6	11.3	11.9	11.9	11.9	13.2	13.5	14.0	13.8
60	A. talamancae AF124113	16.2	16.0	16.2	16.5	16.5	16.2	17.0	17.0	15.5	15.0	15.0	15.0	15.0	15.0	15.3	13.6	15.0	14.5	14.6	13.7	13.7	13.7	13.7	14.2	14.2	13.6	14.2	14.3	13.1	13.2	13.1	13.1	13.1	13.9	14.2	14.5	9.8	9.9	9.9	9.9	10.1	10.1	10.1	10.1	11.5	11.8	11.2	11.8
61	A. talamancae AF128586	16.2	16.0	16.2	16.5	16.5	16.2	17.0	17.0	15.5	15.0	15.0	15.0	15.0	15.0	15.3	13.6	15.0	14.5	14.6	13.7	13.7	13.7	13.7	14.2	14.2	13.6	14.2	14.3	13.1	13.2	13.1	13.1	13.1	13.9	14.2	14.5	9.8	9.9	9.9	9.9	10.1	10.1	10.1	10.1	11.5	11.8	11.2	11.8
62	A. talamancae AY364562	16.5	16.8	17.1	17.3	17.3	16.5	17.6	17.6	16.4	16.4	16.4	15.8	15.8	15.8	16.1	15.0	16.7	16.2	15.4	16.2	16.2	16.2	16.2	14.7	15.3	14.7	15.0	16.0	15.1	14.9	14.6	14.6	14.6	14.2	14.5	14.7	11.8	10.4	10.7	10.7	11.0	10.7	10.7	10.7	12.0	12.3	12.9	13.2
63	A. aff. marchesianus AY263232	11.9	12.2	12.8	13.0	12.7	13.1	13.3	13.3	15.3	15.0	15.0	14.7	14.7	14.7	14.4	13.6	14.7	13.6	12.9	12.0	12.0	12.0	12.0	12.2	12.2	11.6	12.5	13.2	12.0	11.8	12.0	12.0	12.0	12.5	12.2	12.5	12.9	12.4	12.7	12.7	13.0	12.7	12.7	12.7	12.9	13.2	12.4	13.2
64	A. aff. tapajos 2 MT627175	11.9	12.2	12.8	13.0	12.7	13.1	13.3	13.3	15.3	15.0	15.0	14.7	14.7	14.7	14.4	13.6	14.7	13.6	12.9	12.0	12.0	12.0	12.0	12.2	12.2	11.6	12.5	13.2	12.0	11.8	12.0	12.0	12.0	12.5	12.2	12.5	12.9	12.4	12.7	12.7	13.0	12.7	12.7	12.7	12.9	13.2	12.4	13.2
65	A. sp. Saul JN690212	11.9	12.2	12.8	13.0	12.7	13.1	13.3	13.3	15.3	15.0	15.0	14.7	14.7	14.7	14.4	13.6	14.7	13.6	12.9	12.0	12.0	12.0	12.0	12.2	12.2	11.6	12.5	13.2	12.0	11.8	12.0	12.0	12.0	12.5	12.2	12.5	12.9	12.4	12.7	12.7	13.0	12.7	12.7	12.7	12.9	13.2	12.4	13.2
66	A. sp. Saul JN690213	11.9	12.2	12.8	13.0	12.7	13.1	13.3	13.3	15.3	15.0	15.0	14.7	14.7	14.7	14.4	13.6	14.7	13.6	12.9	12.0	12.0	12.0	12.0	12.2	12.2	11.6	12.5	13.2	12.0	11.8	12.0	12.0	12.0	12.5	12.2	12.5	12.9	12.4	12.7	12.7	13.0	12.7	12.7	12.7	12.9	13.2	12.4	13.2
67	A. sp. Saul JN690214	11.9	12.2	12.8	13.0	12.7	13.1	13.3	13.3	15.3	15.0	15.0	14.7	14.7	14.7	14.4	13.6	14.7	13.6	12.9	12.0	12.0	12.0	12.0	12.2	12.2	11.6	12.5	13.2	12.0	11.8	12.0	12.0	12.0	12.5	12.2	12.5	12.9	12.4	12.7	12.7	13.0	12.7	12.7	12.7	12.9	13.2	12.4	13.2
68	A. aff. tapajos 3 MT627189	11.9	12.2	11.9	12.2	11.9	11.4	12.2	12.2	13.8	14.1	14.1	13.3	13.3	13.3	13.6	13.3	12.4	11.6	12.3	12.0	12.0	12.0	12.0	12.2	12.8	11.9	13.6	13.8	11.5	11.5	11.7	11.7	11.7	12.5	12.2	13.0	13.5	13.0	12.7	12.7	13.0	12.7	12.7	12.7	11.5	11.8	12.4	11.8
69	A. aff. tapajos 1 MT627197	13.1	13.4	14.2	14.4	14.2	13.9	13.9	13.9	15.3	15.0	15.0	14.7	14.7	14.7	14.1	15.0	13.6	12.5	13.7	9.8	9.8	9.8	9.8	13.0	13.0	11.9	13.9	14.4	12.0	12.1	12.0	12.0	12.0	13.9	13.6	14.5	13.4	14.1	14.1	14.1	14.4	14.1	14.1	14.1	13.7	14.0	12.9	13.2
70	A. sp. Santa Maria JN690211	13.1	13.4	14.2	14.4	14.2	13.9	13.9	13.9	15.3	15.0	15.0	14.7	14.7	14.7	14.1	15.0	13.6	12.5	13.7	9.8	9.8	9.8	9.8	13.0	13.0	11.9	13.9	14.4	12.0	12.1	12.0	12.0	12.0	13.9	13.6	14.5	13.4	14.1	14.1	14.1	14.4	14.1	14.1	14.1	13.7	14.0	12.9	13.2
71	A. tapajos KR047027	12.5	12.8	13.6	13.9	13.6	13.6	13.3	13.3	14.4	14.7	14.7	13.8	13.8	13.8	13.8	14.1	12.7	11.4	13.7	10.6	10.6	10.6	10.6	13.6	14.2	13.0	15.1	15.2	12.9	12.9	12.9	12.9	12.9	13.3	13.0	13.9	13.2	12.7	13.0	13.0	13.2	13.0	13.0	13.0	12.9	13.2	12.0	12.9
72	A. tapajos KR047028	12.5	12.8	13.6	13.9	13.6	13.6	13.3	13.3	14.4	14.7	14.7	13.8	13.8	13.8	14.4	14.1	13.6	11.9	13.7	11.7	11.7	11.7	11.7	13.9	14.5	13.3	14.8	15.5	13.5	13.5	13.5	13.5	13.5	13.0	12.8	13.6	12.6	13.2	13.0	13.0	13.2	13.0	13.0	13.0	12.3	12.6	11.5	12.9
73	A. tapajos KX524470	12.2	12.5	13.4	13.6	13.3	13.4	13.0	13.0	14.1	14.4	14.4	13.6	13.6	13.6	14.1	13.8	13.3	11.6	13.4	11.5	11.5	11.5	11.5	13.3	13.9	12.8	14.2	14.9	13.2	13.2	13.2	13.2	13.2	12.8	12.5	13.3	12.6	12.7	13.0	13.0	13.2	13.0	13.0	13.0	12.9	13.2	12.0	12.9
74	A. tapajos ZUFMS-AMP13418_OK349679	10.8	11.1	11.6	11.9	11.6	11.4	11.9	11.9	13.2	14.1	14.1	13.0	13.0	13.0	13.8	12.7	12.1	11.0	12.0	12.9	12.9	12.9	12.9	11.6	12.1	11.6	12.1	12.3	12.0	12.0	11.7	11.7	11.7	11.0	10.7	11.6	13.5	13.0	13.3	13.3	13.6	13.3	13.3	13.3	12.4	12.7	11.8	13.0
75	A. tapajos CHUFPB30308_OK349680	10.8	11.1	11.6	11.9	11.6	11.4	11.9	11.9	13.2	14.1	14.1	13.0	13.0	13.0	13.8	12.7	12.1	11.0	12.0	12.9	12.9	12.9	12.9	11.6	12.1	11.6	12.1	12.3	12.0	12.0	11.7	11.7	11.7	11.0	10.7	11.6	13.5	13.0	13.3	13.3	13.6	13.3	13.3	13.3	12.4	12.7	11.8	13.0
76	A. aff. melanolaemusi MT627203	12.5	12.3	12.0	12.5	12.5	12.5	12.2	12.2	14.4	14.4	14.4	13.6	13.6	13.6	13.8	15.0	13.8	13.4	15.1	10.3	10.3	10.3	10.3	12.7	13.3	12.4	13.9	12.6	11.1	11.2	12.6	12.6	12.6	13.0	12.7	13.6	12.6	13.0	13.0	13.0	12.7	13.2	13.2	13.2	12.9	13.2	13.2	11.2
77	A. sp. Serra do Divisor KY886580	12.5	12.3	12.0	12.5	12.5	12.5	12.2	12.2	14.4	14.4	14.4	13.6	13.6	13.6	13.8	15.0	13.8	13.4	15.1	10.3	10.3	10.3	10.3	12.7	13.3	12.4	13.9	12.6	11.1	11.2	12.6	12.6	12.6	13.0	12.7	13.6	12.6	13.0	13.0	13.0	12.7	13.2	13.2	13.2	12.9	13.2	13.2	11.2
78	A. sp. Serra do Divisor KY886581	12.5	12.3	12.0	12.5	12.5	12.5	12.2	12.2	14.4	14.4	14.4	13.6	13.6	13.6	13.8	15.0	13.8	13.4	15.1	10.3	10.3	10.3	10.3	12.7	13.3	12.4	13.9	12.6	11.1	11.2	12.6	12.6	12.6	13.0	12.7	13.6	12.6	13.0	13.0	13.0	12.7	13.2	13.2	13.2	12.9	13.2	13.2	11.2
79	A. sp. Serra do Divisor KY886582	12.5	12.3	12.0	12.5	12.5	12.5	12.2	12.2	14.4	14.4	14.4	13.6	13.6	13.6	13.8	15.0	13.8	13.4	15.1	10.3	10.3	10.3	10.3	12.7	13.3	12.4	13.9	12.6	11.1	11.2	12.6	12.6	12.6	13.0	12.7	13.6	12.6	13.0	13.0	13.0	12.7	13.2	13.2	13.2	12.9	13.2	13.2	11.2
80	A. melanolaemus MT524148	10.5	10.5	10.3	10.8	10.8	10.5	11.1	11.1	12.7	13.0	13.0	12.1	12.1	12.1	13.0	13.0	11.3	11.4	13.4	10.9	10.9	10.9	10.9	11.8	12.4	11.6	13.0	11.7	10.6	10.6	11.1	11.1	11.1	12.7	12.4	13.3	10.9	11.8	11.8	11.8	11.5	11.5	11.5	11.5	12.0	12.3	12.9	10.7
81	A. sp. Cruzeiro do Sul MF624181	11.4	11.4	11.1	11.6	11.6	12.3	11.4	11.4	13.8	13.6	13.6	12.7	12.7	12.7	13.3	13.6	11.9	11.4	13.4	10.1	10.1	10.1	10.1	11.0	11.0	10.1	11.2	10.0	10.6	10.6	10.6	10.6	10.6	12.4	12.7	12.7	10.4	11.0	11.0	11.0	10.7	10.7	10.7	10.7	11.2	11.5	12.0	11.0
82	A. sp. n. MT446458	11.7	11.7	11.4	11.9	11.9	12.3	11.6	11.6	14.4	14.1	14.1	13.3	13.3	13.3	13.8	14.1	12.4	11.9	14.0	10.1	10.1	10.1	10.1	11.2	11.2	10.4	11.5	10.3	10.6	10.6	10.9	10.9	10.9	12.7	12.7	13.0	10.6	11.3	11.3	11.3	11.0	11.0	11.0	11.0	11.5	11.8	12.3	11.0
83	A. sp. n. MT446460	11.7	11.7	11.4	11.9	11.9	12.3	11.6	11.6	14.4	14.1	14.1	13.3	13.3	13.3	13.8	14.1	12.4	11.9	14.0	10.1	10.1	10.1	10.1	11.2	11.2	10.4	11.5	10.3	10.6	10.6	10.9	10.9	10.9	12.7	12.7	13.0	10.6	11.3	11.3	11.3	11.0	11.0	11.0	11.0	11.5	11.8	12.3	11.0
84	A. sp. Cruzeiro do Sul KY886579	11.7	11.7	11.4	11.9	11.9	12.3	11.6	11.6	14.4	14.1	14.1	13.3	13.3	13.3	13.8	14.1	12.4	11.9	14.0	10.1	10.1	10.1	10.1	11.2	11.2	10.4	11.5	10.3	10.6	10.6	10.9	10.9	10.9	12.7	12.7	13.0	10.6	11.3	11.3	11.3	11.0	11.0	11.0	11.0	11.5	11.8	12.3	11.0
85	A. sp. n. MT446459	11.8	11.8	11.5	12.1	12.1	12.4	11.8	11.8	14.6	14.3	14.3	13.4	13.4	13.4	14.0	14.3	12.6	12.1	14.1	10.2	10.2	10.2	10.2	11.4	11.4	10.5	11.7	10.4	10.7	10.7	11.0	11.0	11.0	12.8	12.8	13.1	10.8	11.4	11.4	11.4	11.1	11.1	11.1	11.1	11.6	11.9	12.5	11.1
86	A. chalcopis KC520676	11.6	11.4	11.9	12.5	12.5	12.2	11.3	11.3	12.1	11.9	11.9	12.4	12.4	12.4	11.9	12.1	11.0	11.6	12.0	10.3	10.3	10.3	10.3	9.0	9.0	7.5	9.3	9.5	8.6	8.6	8.9	8.9	8.9	10.1	10.4	10.1	10.4	11.0	11.0	11.0	11.3	11.3	11.3	11.3	11.2	11.5	10.9	10.7
87	A. chalcopis MT627182	11.6	11.4	11.9	12.5	12.5	12.2	11.3	11.3	12.1	11.9	11.9	12.4	12.4	12.4	11.9	12.1	11.0	11.6	12.0	10.3	10.3	10.3	10.3	9.0	9.0	7.5	9.3	9.5	8.6	8.6	8.9	8.9	8.9	10.1	10.4	10.1	10.4	11.0	11.0	11.0	11.3	11.3	11.3	11.3	11.2	11.5	10.9	10.7
88	A. chalcopis KC520678	11.4	11.1	11.6	12.2	12.2	11.9	11.0	11.0	11.9	11.6	11.6	12.1	12.1	12.1	11.6	11.9	10.7	11.4	11.7	10.1	10.1	10.1	10.1	9.0	9.0	7.5	9.3	9.5	8.3	8.3	8.6	8.6	8.6	10.1	10.4	10.1	10.1	10.7	10.7	10.7	11.0	11.0	11.0	11.0	10.9	11.2	10.6	10.4
89	A. sp. Huanuco MT524143	11.1	10.8	10.8	11.0	11.0	11.4	11.6	11.6	12.1	12.1	12.1	11.0	11.0	11.0	12.1	10.7	11.0	10.2	11.1	9.5	9.5	9.5	9.5	12.5	12.5	11.0	12.5	11.8	10.0	10.1	11.2	11.2	11.2	11.9	11.6	12.5	11.5	11.5	11.5	11.5	11.8	11.8	11.8	11.8	12.0	12.3	12.0	10.1
90	A. sp. Huanuco MT524145	11.1	10.8	10.8	11.0	11.0	11.4	11.6	11.6	12.1	12.1	12.1	11.0	11.0	11.0	12.1	10.7	11.0	10.2	11.1	9.5	9.5	9.5	9.5	12.5	12.5	11.0	12.5	11.8	10.0	10.1	11.2	11.2	11.2	11.9	11.6	12.5	11.5	11.5	11.5	11.5	11.8	11.8	11.8	11.8	12.0	12.3	12.0	10.1
91	A. sp. Huanuco MT627187	11.1	10.8	10.8	11.0	11.0	11.4	11.6	11.6	12.1	12.1	12.1	11.0	11.0	11.0	12.1	10.7	11.0	10.2	11.1	9.5	9.5	9.5	9.5	12.5	12.5	11.0	12.5	11.8	10.0	10.1	11.2	11.2	11.2	11.9	11.6	12.5	11.5	11.5	11.5	11.5	11.8	11.8	11.8	11.8	12.0	12.3	12.0	10.1
92	A. paleovarzensis JQ966835	10.5	10.2	10.8	11.3	11.6	10.5	10.8	10.8	11.9	12.1	12.1	11.6	11.6	11.6	11.3	11.0	10.2	10.8	11.4	8.7	8.7	8.7	8.7	10.4	11.0	10.1	10.7	10.3	9.2	9.2	10.0	10.0	10.0	11.6	11.3	11.6	10.6	11.3	11.3	11.3	11.0	11.5	11.5	11.5	10.9	11.2	10.4	10.4
93	A. paleovarzensis JQ966836	10.5	10.2	10.8	11.3	11.6	10.5	10.8	10.8	11.9	12.1	12.1	11.6	11.6	11.6	11.3	11.0	10.2	10.8	11.4	8.7	8.7	8.7	8.7	10.4	11.0	10.1	10.7	10.3	9.2	9.2	10.0	10.0	10.0	11.6	11.3	11.6	10.6	11.3	11.3	11.3	11.0	11.5	11.5	11.5	10.9	11.2	10.4	10.4
94	A. paleovarzensis JQ966837	10.2	9.9	10.5	11.0	11.3	10.2	11.0	11.0	12.1	12.4	12.4	11.9	11.9	11.9	11.6	10.7	10.5	11.1	11.4	8.4	8.4	8.4	8.4	10.4	11.0	10.1	10.7	10.3	9.2	9.2	10.0	10.0	10.0	11.6	11.3	11.6	10.4	11.0	11.0	11.0	10.7	11.3	11.3	11.3	11.2	11.5	10.6	10.1
95	A. sp. Ica MF624182	11.4	11.1	11.1	11.6	11.9	11.1	11.3	11.3	12.4	12.7	12.7	12.1	12.1	12.1	12.4	11.5	11.3	11.9	12.3	9.2	9.2	9.2	9.2	9.5	10.1	8.7	10.7	9.5	8.0	8.0	9.1	9.1	9.1	11.0	10.7	11.0	11.2	12.1	12.1	12.1	11.8	12.4	12.4	12.4	11.8	12.0	11.5	9.6
96	A. spumaponens KC520682	11.1	10.8	10.8	11.4	11.4	11.7	11.9	11.9	13.6	13.8	13.8	13.0	13.0	13.0	12.7	10.7	11.3	11.4	11.7	10.3	10.3	10.3	10.3	10.4	11.0	10.1	11.6	11.8	11.5	11.5	11.7	11.7	11.7	11.6	11.9	11.6	11.0	11.0	10.7	10.7	10.5	11.0	11.0	11.0	11.0	10.7	10.7	9.3
97	A. sumtuosus KF250494	12.3	12.0	12.0	12.5	12.5	12.3	12.8	12.8	14.1	14.4	14.4	13.6	13.6	13.6	13.3	11.9	12.4	12.5	12.9	10.1	10.1	10.1	10.1	11.6	12.2	10.7	12.5	12.9	10.9	10.9	11.5	11.5	11.5	12.5	12.2	12.5	12.1	11.9	11.6	11.6	11.3	11.9	11.9	11.9	12.1	11.8	12.4	9.9
98	A. sumtuosus KF250495	12.0	11.7	11.7	12.2	12.2	12.0	12.5	12.5	13.8	14.1	14.1	13.3	13.3	13.3	13.0	11.6	12.1	12.2	12.6	9.8	9.8	9.8	9.8	11.3	11.9	10.4	12.5	12.6	10.6	10.6	11.2	11.2	11.2	12.2	11.9	12.2	11.8	11.6	11.3	11.3	11.0	11.6	11.6	11.6	11.8	11.5	12.1	9.6
99	A. sumtuosus KF250496	12.0	11.7	11.7	12.2	12.2	12.0	12.5	12.5	13.8	14.1	14.1	13.3	13.3	13.3	13.0	11.6	12.1	12.2	12.6	9.8	9.8	9.8	9.8	11.3	11.9	10.4	12.5	12.6	10.6	10.6	11.2	11.2	11.2	12.2	11.9	12.2	11.8	11.6	11.3	11.3	11.0	11.6	11.6	11.6	11.8	11.5	12.1	9.6
100	A. aff. trilineatus 1 MT524132	11.1	11.1	11.1	11.6	11.6	11.4	11.3	11.3	12.4	12.7	12.7	11.6	11.6	11.6	12.7	11.9	11.3	11.1	13.1	10.1	10.1	10.1	10.1	11.6	12.2	10.7	12.5	12.1	10.3	10.3	10.3	10.3	10.3	12.5	12.8	13.0	10.4	11.5	11.5	11.5	11.5	11.3	11.3	11.3	10.4	10.6	10.9	11.0
101	A. sp. Liberdade MF624184	11.9	11.9	11.9	12.5	12.5	12.2	12.2	12.2	12.7	13.0	13.0	11.9	11.9	11.9	13.0	12.1	11.6	11.4	13.1	10.3	10.3	10.3	10.3	11.6	11.6	10.7	12.5	12.6	11.2	11.2	11.2	11.2	11.2	13.0	12.8	13.0	10.6	11.8	11.8	11.8	11.8	11.5	11.5	11.5	9.8	10.1	10.4	11.2
102	A. aff. trilineatus 1 MT524141	11.1	11.1	11.4	11.9	11.9	12.2	11.6	11.6	13.0	13.3	13.3	12.7	12.7	12.7	13.3	12.7	12.1	11.6	13.1	10.9	10.9	10.9	10.9	11.0	11.6	10.7	11.9	12.6	11.5	11.5	11.2	11.2	11.2	12.8	13.0	13.3	11.2	12.4	12.4	12.4	12.4	12.1	12.1	12.1	10.6	10.9	10.9	11.8
103	A. aff. trilineatus 1 MT524142	11.1	11.1	11.4	11.9	11.9	12.2	11.6	11.6	13.0	13.3	13.3	12.7	12.7	12.7	13.3	12.7	12.1	11.6	13.1	11.2	11.2	11.2	11.2	11.0	11.6	10.7	11.9	12.6	11.5	11.5	11.2	11.2	11.2	12.8	13.0	13.3	11.2	12.4	12.4	12.4	12.4	12.1	12.1	12.1	10.6	10.9	10.9	11.8
104	A. trilineatus MW293945	11.1	11.1	11.1	11.4	11.4	11.4	11.1	11.1	10.5	10.8	10.8	10.0	10.0	10.0	10.5	11.4	10.3	10.6	12.4	10.1	10.1	10.1	10.1	11.3	11.9	10.4	12.5	11.9	10.1	10.1	10.7	10.7	10.7	12.8	13.0	13.3	10.7	11.9	11.9	11.9	11.9	11.6	11.6	11.6	10.5	10.7	11.0	11.3
105	A. trilineatus MW293946	11.1	11.1	11.1	11.4	11.4	11.4	11.1	11.1	10.5	10.8	10.8	10.0	10.0	10.0	10.5	11.4	10.3	10.6	12.4	10.1	10.1	10.1	10.1	11.3	11.9	10.4	12.5	11.9	10.1	10.1	10.7	10.7	10.7	12.8	13.0	13.3	10.7	11.9	11.9	11.9	11.9	11.6	11.6	11.6	10.5	10.7	11.0	11.3
106	A. trilineatus MW293947	11.1	11.1	11.1	11.4	11.4	11.4	11.1	11.1	10.5	10.8	10.8	10.0	10.0	10.0	10.5	11.4	10.3	10.6	12.4	10.1	10.1	10.1	10.1	11.3	11.9	10.4	12.5	11.9	10.1	10.1	10.7	10.7	10.7	12.8	13.0	13.3	10.7	11.9	11.9	11.9	11.9	11.6	11.6	11.6	10.5	10.7	11.0	11.3
107	A. aff. trilineatus 2 MT524134	11.4	11.4	12.0	12.5	12.5	11.7	11.9	11.9	13.9	14.4	14.4	13.6	13.6	13.6	14.7	13.0	13.6	13.7	13.8	11.2	11.2	11.2	11.2	12.8	13.4	11.9	13.4	13.0	11.2	11.2	10.9	10.9	10.9	13.4	13.7	13.4	11.2	11.9	11.9	11.9	11.9	11.6	11.6	11.6	10.7	11.0	11.2	12.7
108	A. aff. trilineatus 2 MT627195	11.4	11.4	12.0	12.5	12.5	11.7	11.9	11.9	13.9	14.4	14.4	13.6	13.6	13.6	14.7	13.0	13.6	13.7	13.8	11.2	11.2	11.2	11.2	12.8	13.4	11.9	13.4	13.0	11.2	11.2	10.9	10.9	10.9	13.4	13.7	13.4	11.2	11.9	11.9	11.9	11.9	11.6	11.6	11.6	10.7	11.0	11.2	12.7
109	A. sp. n. MW293941	11.4	11.4	11.9	12.5	12.5	11.6	11.9	11.9	13.8	14.4	14.4	13.6	13.6	13.6	14.7	13.0	13.6	13.6	14.0	11.2	11.2	11.2	11.2	12.8	13.3	11.9	13.3	12.9	11.2	11.2	10.9	10.9	10.9	13.3	13.6	13.3	11.2	11.8	11.8	11.8	11.8	11.5	11.5	11.5	10.6	10.9	11.2	12.6
110	A. sp. n. MW293942	11.9	11.9	12.5	13.0	13.0	12.2	12.5	12.5	13.8	14.4	14.4	13.6	13.6	13.6	14.7	13.6	13.6	13.6	14.6	11.2	11.2	11.2	11.2	12.8	13.3	11.9	13.3	12.9	11.2	11.2	10.9	10.9	10.9	13.3	13.6	13.3	11.2	12.4	12.4	12.4	12.4	12.1	12.1	12.1	11.2	11.5	11.8	12.6
111	A. sp. n. MW293943	11.9	11.9	12.5	13.0	13.0	12.2	12.5	12.5	13.8	14.4	14.4	13.6	13.6	13.6	14.7	13.6	13.6	13.6	14.6	11.2	11.2	11.2	11.2	12.8	13.3	11.9	13.3	12.9	11.2	11.2	10.9	10.9	10.9	13.3	13.6	13.3	11.2	12.4	12.4	12.4	12.4	12.1	12.1	12.1	11.2	11.5	11.8	12.6
112	A. ranoides KJ130697	11.6	11.4	12.2	12.7	12.7	13.1	12.5	12.5	13.2	13.5	13.5	13.8	13.8	13.8	14.4	14.4	13.2	13.6	14.5	12.5	12.5	12.5	12.5	12.1	12.7	11.6	12.7	11.5	12.0	12.0	11.7	11.7	11.7	12.7	13.0	12.1	11.5	11.3	11.0	11.0	10.7	11.3	11.3	11.3	12.3	12.0	12.3	11.8
113	A. ranoides KJ130698	11.6	11.4	12.2	12.7	12.7	13.1	12.5	12.5	13.2	13.5	13.5	13.8	13.8	13.8	14.4	14.4	13.2	13.6	14.5	12.5	12.5	12.5	12.5	12.1	12.7	11.6	12.7	11.5	12.0	12.0	11.7	11.7	11.7	12.7	13.0	12.1	11.5	11.3	11.0	11.0	10.7	11.3	11.3	11.3	12.3	12.0	12.3	11.8
114	A. sp. Ucuyali MT524137	11.6	11.4	11.6	12.2	12.2	12.2	11.6	11.6	13.0	13.8	13.8	13.5	13.5	13.5	14.4	13.8	13.0	12.7	13.9	10.3	10.3	10.3	10.3	12.4	12.4	11.5	13.5	12.3	10.9	10.9	10.3	10.3	10.3	13.3	13.0	13.0	10.1	11.0	11.0	11.0	11.3	11.3	11.3	11.3	11.8	12.0	12.3	10.1
115	A. sp. APL 14596 MT108713	12.5	12.5	12.2	12.5	12.5	12.8	12.5	12.5	13.0	13.2	13.2	13.2	13.2	13.2	13.5	12.1	11.8	11.3	13.1	12.5	12.5	12.5	12.5	14.1	14.7	13.3	15.0	14.3	12.9	12.9	12.6	12.6	12.6	13.8	14.1	14.7	11.5	11.5	11.8	11.8	12.1	11.5	11.5	11.5	13.2	13.4	13.4	12.1
116	A. sp. APL 14710 MT108712	12.5	12.5	12.2	12.5	12.5	12.8	12.5	12.5	13.0	13.2	13.2	13.2	13.2	13.2	13.5	12.1	11.8	11.3	13.1	12.5	12.5	12.5	12.5	14.1	14.7	13.3	15.0	14.3	12.9	12.9	12.6	12.6	12.6	13.8	14.1	14.7	11.5	11.5	11.8	11.8	12.1	11.5	11.5	11.5	13.2	13.4	13.4	12.1
117	A. sp. APL 15877 MT108714	12.8	12.8	12.5	12.7	12.7	13.1	13.0	13.0	13.2	13.5	13.5	13.5	13.5	13.5	13.8	11.8	11.5	11.0	13.4	12.3	12.3	12.3	12.3	14.4	15.0	13.5	15.3	14.6	13.1	13.2	12.9	12.9	12.9	14.4	14.7	15.3	11.2	11.3	11.5	11.5	11.8	11.3	11.3	11.3	12.9	13.2	13.2	11.8
118	A. sp.MT108707	13.6	13.6	13.6	14.2	14.2	14.8	13.9	13.9	16.1	15.8	15.8	16.1	16.1	16.1	16.9	15.2	14.1	13.6	16.8	13.1	13.1	13.1	13.1	14.1	14.1	12.7	14.4	13.5	13.1	13.2	13.1	13.1	13.1	14.4	14.7	15.3	12.0	12.4	12.7	12.7	13.0	12.4	12.4	12.4	14.3	14.6	14.3	12.9
119	A. sp. MT108705	13.6	13.6	13.6	14.2	14.2	14.8	13.9	13.9	16.1	15.8	15.8	16.1	16.1	16.1	16.9	15.2	14.1	13.6	16.8	13.1	13.1	13.1	13.1	14.4	14.4	13.0	14.7	13.8	13.4	13.5	12.9	12.9	12.9	14.7	15.0	15.6	12.0	12.4	12.7	12.7	13.0	12.4	12.4	12.4	14.3	14.6	14.3	12.9
120	A. sp. MT108706	13.6	13.6	13.6	14.2	14.2	14.8	13.9	13.9	16.1	15.8	15.8	16.1	16.1	16.1	16.9	15.2	14.1	13.6	16.8	13.1	13.1	13.1	13.1	14.4	14.4	13.0	14.7	13.8	13.4	13.5	12.9	12.9	12.9	14.7	15.0	15.6	12.0	12.4	12.7	12.7	13.0	12.4	12.4	12.4	14.3	14.6	14.3	12.9
121	A. tinae KY886588	13.4	13.4	13.9	14.4	14.4	13.9	13.6	13.6	16.3	16.6	16.6	16.1	16.1	16.1	16.3	14.6	13.5	13.6	16.2	13.4	13.4	13.4	13.4	13.8	14.4	13.0	14.7	13.8	13.1	13.2	13.4	13.4	13.4	14.7	14.4	15.0	12.3	13.2	13.5	13.5	13.8	13.2	13.2	13.2	13.7	14.0	13.7	12.9
122	A. tinae KY886589	13.1	13.1	13.6	14.2	14.2	13.6	13.3	13.3	16.1	16.3	16.3	15.8	15.8	15.8	16.1	14.4	13.2	13.3	15.9	13.1	13.1	13.1	13.1	13.5	14.1	12.7	14.4	13.8	12.9	12.9	13.1	13.1	13.1	14.4	14.1	14.7	12.0	13.0	13.2	13.2	13.5	13.0	13.0	13.0	13.4	13.7	13.4	12.6
123	A. sp. Tefe MG252612	13.4	13.4	13.9	14.4	14.4	13.9	13.0	13.0	15.5	15.2	15.2	15.5	15.5	15.5	15.8	14.9	13.2	13.3	15.9	11.7	11.7	11.7	11.7	14.4	14.4	13.0	14.7	13.8	12.6	12.6	12.6	12.6	12.6	15.3	15.0	15.0	10.9	12.4	12.1	12.1	12.4	11.8	11.8	11.8	12.6	12.9	12.6	12.1
124	A. sp. Tefe MG252613	13.4	13.4	13.9	14.4	14.4	13.9	13.0	13.0	15.5	15.2	15.2	15.5	15.5	15.5	15.8	14.9	13.2	13.3	15.9	11.7	11.7	11.7	11.7	14.4	14.4	13.0	14.7	13.8	12.6	12.6	12.6	12.6	12.6	15.3	15.0	15.0	10.9	12.4	12.1	12.1	12.4	11.8	11.8	11.8	12.6	12.9	12.6	12.1
125	A. tinae KY886590	13.4	13.4	13.9	14.4	14.4	13.9	13.0	13.0	15.5	15.2	15.2	15.5	15.5	15.5	15.8	14.9	13.2	13.3	15.9	11.7	11.7	11.7	11.7	14.4	14.4	13.0	14.7	13.8	12.6	12.6	12.6	12.6	12.6	15.3	15.0	15.0	10.9	12.4	12.1	12.1	12.4	11.8	11.8	11.8	12.6	12.9	12.6	12.1
126	A. humilis AJ430673	13.4	13.1	13.1	13.6	13.6	13.4	13.9	13.9	15.5	15.2	15.2	15.2	15.2	15.2	15.8	13.5	13.5	14.2	14.5	11.7	11.7	11.7	11.7	14.2	14.2	12.7	13.9	14.3	12.6	12.6	13.4	13.4	13.4	13.9	13.6	13.9	11.2	12.1	12.1	12.1	12.4	12.4	12.4	12.4	11.2	11.5	11.8	12.1
127	A. humilis KJ940454	13.4	13.1	13.1	13.6	13.6	13.4	13.9	13.9	15.5	15.2	15.2	15.2	15.2	15.2	15.8	13.5	13.5	14.2	14.5	11.7	11.7	11.7	11.7	14.2	14.2	12.7	13.9	14.3	12.6	12.6	13.4	13.4	13.4	13.9	13.6	13.9	11.2	12.1	12.1	12.1	12.4	12.4	12.4	12.4	11.2	11.5	11.8	12.1
128	A. pittieri EU380801	12.8	12.5	12.5	13.0	13.0	13.0	13.3	13.3	16.1	15.8	15.8	15.5	15.5	15.5	16.1	14.1	13.8	13.9	15.1	12.8	12.8	12.8	12.8	13.9	14.5	14.2	14.7	14.6	14.3	14.3	14.6	14.6	14.6	14.2	13.9	14.2	12.9	12.4	12.6	12.6	12.9	12.9	12.9	12.9	13.1	12.9	13.7	12.6
129	A. pittieri EU380802	12.8	12.5	12.5	13.0	13.0	13.0	13.3	13.3	16.1	15.8	15.8	15.5	15.5	15.5	16.1	14.1	13.8	13.9	15.1	12.8	12.8	12.8	12.8	13.9	14.5	14.2	14.7	14.6	14.3	14.3	14.6	14.6	14.6	14.2	13.9	14.2	12.9	12.4	12.6	12.6	12.9	12.9	12.9	12.9	13.1	12.9	13.7	12.6
130	A. pittieri EU380803	12.8	12.5	12.5	13.0	13.0	13.0	13.3	13.3	16.1	15.8	15.8	15.5	15.5	15.5	16.1	14.1	13.8	13.9	15.1	12.8	12.8	12.8	12.8	13.9	14.5	14.2	14.7	14.6	14.3	14.3	14.6	14.6	14.6	14.2	13.9	14.2	12.9	12.4	12.6	12.6	12.9	12.9	12.9	12.9	13.1	12.9	13.7	12.6
131	A. kingsburyi AY364549	12.8	12.8	13.1	13.6	13.6	14.5	13.9	13.9	15.5	14.9	14.9	14.9	14.9	14.9	15.2	15.8	15.2	14.4	15.7	13.4	13.4	13.4	13.4	12.4	12.4	11.8	13.0	12.3	12.0	11.7	11.1	11.1	11.1	12.1	12.4	12.7	10.9	12.1	12.4	12.4	12.1	12.1	12.1	12.1	12.3	12.6	12.6	12.1
132	A. kingsburyi EU342526	12.8	12.8	12.5	13.0	13.0	14.5	13.9	13.9	15.8	15.2	15.2	15.2	15.2	15.2	15.5	16.1	15.5	14.7	16.0	13.4	13.4	13.4	13.4	12.4	12.4	11.8	13.0	12.3	12.0	11.7	11.1	11.1	11.1	12.1	12.4	12.7	10.9	12.1	12.4	12.4	12.1	12.1	12.1	12.1	12.3	12.6	13.2	12.4
133	A. kingsburyi AY364550	12.2	12.2	12.5	13.0	13.0	13.9	13.3	13.3	15.2	14.6	14.6	14.6	14.6	14.6	14.9	15.5	14.9	14.2	15.4	13.4	13.4	13.4	13.4	11.6	11.6	11.0	12.1	11.7	12.0	11.7	11.1	11.1	11.1	11.3	11.6	11.8	10.9	12.1	12.4	12.4	12.1	12.1	12.1	12.1	12.3	12.0	13.2	12.4
134	A. fratisenescus MF624172	15.1	15.1	14.8	15.0	15.0	15.6	15.3	15.3	14.6	14.4	14.4	14.9	14.9	14.9	14.9	15.5	14.4	13.9	15.6	13.6	13.6	13.6	13.6	15.3	15.6	14.7	16.1	16.6	15.4	15.5	15.4	15.4	15.4	15.3	15.6	15.0	12.0	13.2	13.0	13.0	13.2	12.7	12.7	12.7	12.3	12.6	13.4	12.6
135	A. ornatus MT524108	10.6	10.3	10.9	11.2	11.2	11.5	11.2	11.2	11.8	12.4	12.4	11.2	11.2	11.2	11.2	11.8	11.2	11.8	12.1	11.5	11.5	11.5	11.5	11.9	12.5	11.6	12.5	11.9	11.8	11.9	12.1	12.1	12.1	13.3	13.6	13.3	11.8	11.9	12.2	12.2	12.5	12.5	12.5	12.5	12.1	11.8	12.7	11.6
136	A. ornatus MT524109	10.6	10.3	10.9	11.2	11.2	11.5	11.2	11.2	11.8	12.4	12.4	11.2	11.2	11.2	11.2	11.8	11.2	11.8	12.1	11.5	11.5	11.5	11.5	11.9	12.5	11.6	12.5	11.9	11.8	11.9	12.1	12.1	12.1	13.3	13.6	13.3	11.8	11.9	12.2	12.2	12.5	12.5	12.5	12.5	12.1	11.8	12.7	11.6
137	A. ornatus MT524112	10.6	10.3	10.9	11.2	11.2	11.5	11.2	11.2	11.8	12.4	12.4	11.2	11.2	11.2	11.2	11.8	11.2	11.8	12.1	11.5	11.5	11.5	11.5	11.9	12.5	11.6	12.5	11.9	11.8	11.9	12.1	12.1	12.1	13.3	13.6	13.3	11.8	11.9	12.2	12.2	12.5	12.5	12.5	12.5	12.1	11.8	12.7	11.6
138	A. aff. masniger/nidicola MT524124	10.3	10.6	10.3	10.6	10.6	11.5	10.9	10.9	12.6	12.3	12.3	12.0	12.0	12.0	12.9	12.3	11.4	10.9	13.0	11.4	11.4	11.4	11.4	11.4	12.0	10.8	11.7	12.8	12.2	12.2	11.6	11.6	11.6	12.0	12.3	12.9	9.5	9.2	8.9	8.9	9.2	8.9	8.9	8.9	11.2	10.9	11.5	10.1
139	A. sp. Santa Maria JN690210	10.9	11.2	10.9	11.2	11.2	11.5	11.5	11.5	12.6	12.3	12.3	12.0	12.0	12.0	12.9	11.7	11.4	10.9	12.4	12.0	12.0	12.0	12.0	12.3	12.9	11.7	12.6	14.0	12.8	12.8	12.2	12.2	12.2	12.0	12.3	12.9	10.0	9.2	8.9	8.9	9.2	8.9	8.9	8.9	10.6	10.3	10.9	10.9
140	A. sp. Santa Maria JN690934	10.9	11.2	10.9	11.2	11.2	11.5	11.5	11.5	12.6	12.3	12.3	12.0	12.0	12.0	12.9	11.7	11.4	10.9	12.4	12.0	12.0	12.0	12.0	12.3	12.9	11.7	12.6	14.0	12.8	12.8	12.2	12.2	12.2	12.0	12.3	12.9	10.0	9.2	8.9	8.9	9.2	8.9	8.9	8.9	10.6	10.3	10.9	10.9
141	A. nidicola DQ502101	10.3	10.6	12.1	12.3	12.3	12.1	11.7	11.7	12.6	12.3	12.3	12.6	12.6	12.6	12.6	12.0	11.4	11.2	12.4	11.4	11.4	11.4	11.4	11.4	12.0	11.1	12.3	12.5	11.9	11.9	11.0	11.0	11.0	12.0	12.3	12.3	9.2	8.9	8.6	8.6	8.9	8.6	8.6	8.6	11.7	11.5	10.9	10.3
142	A. nidicola DQ502142	10.3	10.6	12.1	12.3	12.3	12.1	11.7	11.7	12.6	12.3	12.3	12.6	12.6	12.6	12.6	12.0	11.4	11.2	12.4	11.4	11.4	11.4	11.4	11.4	12.0	11.1	12.3	12.5	11.9	11.9	11.0	11.0	11.0	12.0	12.3	12.3	9.2	8.9	8.6	8.6	8.9	8.6	8.6	8.6	11.7	11.5	10.9	10.3
143	A. nidicola DQ502210	10.3	10.6	12.1	12.3	12.3	12.1	11.7	11.7	12.6	12.3	12.3	12.6	12.6	12.6	12.6	12.0	11.4	11.2	12.4	11.4	11.4	11.4	11.4	11.4	12.0	11.1	12.3	12.5	11.9	11.9	11.0	11.0	11.0	12.0	12.3	12.3	9.2	8.9	8.6	8.6	8.9	8.6	8.6	8.6	11.7	11.5	10.9	10.3
144	A. sp. Lago Cipotuba JN690209	10.7	11.0	11.3	11.5	11.5	11.3	12.1	12.1	14.1	13.8	13.8	13.5	13.5	13.5	14.4	13.8	13.5	12.7	14.5	12.6	12.6	12.6	12.6	12.4	12.9	12.1	13.2	13.7	12.0	12.0	11.7	11.7	11.7	12.4	12.6	12.6	9.5	9.3	9.0	9.0	9.3	9.0	9.0	9.0	11.0	11.2	11.8	11.0
145	A. sp. Lago Cipotuba JN690933	10.7	11.0	11.3	11.5	11.5	11.3	12.1	12.1	14.1	13.8	13.8	13.5	13.5	13.5	14.4	13.8	13.5	12.7	14.5	12.6	12.6	12.6	12.6	12.4	12.9	12.1	13.2	13.7	12.0	12.0	11.7	11.7	11.7	12.4	12.6	12.6	9.5	9.3	9.0	9.0	9.3	9.0	9.0	9.0	11.0	11.2	11.8	11.0
146	A. masniger JQ966873	11.0	11.3	11.9	12.2	12.2	11.3	11.6	11.6	13.3	13.3	13.3	13.0	13.0	13.0	13.9	13.3	12.8	12.5	13.6	13.3	13.3	13.3	13.3	12.4	12.9	12.1	13.2	14.3	12.5	12.6	12.0	12.0	12.0	13.2	13.5	12.9	8.7	9.1	8.8	8.8	9.1	8.8	8.8	8.8	9.9	10.2	10.8	10.8
147	A. masniger JQ966874	11.0	11.3	11.9	12.2	12.2	11.3	11.6	11.6	13.3	13.3	13.3	13.0	13.0	13.0	13.9	13.3	12.8	12.5	13.6	13.3	13.3	13.3	13.3	12.4	12.9	12.1	13.2	14.3	12.5	12.6	12.0	12.0	12.0	13.2	13.5	12.9	8.7	9.1	8.8	8.8	9.1	8.8	8.8	8.8	9.9	10.2	10.8	10.8
148	A. masniger JQ966875	11.0	11.3	11.9	12.2	12.2	11.3	11.6	11.6	13.3	13.3	13.3	13.0	13.0	13.0	13.9	13.3	12.8	12.5	13.6	13.3	13.3	13.3	13.3	12.4	12.9	12.1	13.2	14.3	12.5	12.6	12.0	12.0	12.0	13.2	13.5	12.9	8.7	9.1	8.8	8.8	9.1	8.8	8.8	8.8	9.9	10.2	10.8	10.8
149	A. nunciatus MK680962	13.1	12.8	13.1	13.3	13.3	13.4	13.9	13.9	15.8	15.5	15.5	14.7	14.7	14.7	15.3	13.8	13.6	13.6	13.7	12.1	12.1	12.1	12.1	13.0	13.6	12.8	13.9	13.8	13.2	13.2	12.9	12.9	12.9	12.8	13.0	13.3	9.6	9.7	9.4	9.4	9.7	9.7	9.7	9.7	11.3	11.0	11.0	10.8
150	A. nunciatus MK680963	13.1	12.8	13.1	13.3	13.3	13.4	13.9	13.9	15.8	15.5	15.5	14.7	14.7	14.7	15.3	13.8	13.6	13.6	13.7	12.1	12.1	12.1	12.1	13.0	13.6	12.8	13.9	13.8	13.2	13.2	12.9	12.9	12.9	12.8	13.0	13.3	9.6	9.7	9.4	9.4	9.7	9.7	9.7	9.7	11.3	11.0	11.0	10.8
151	A. nunciatus MK680964	13.1	12.8	13.1	13.3	13.3	13.4	13.9	13.9	15.8	15.5	15.5	14.7	14.7	14.7	15.3	13.8	13.6	13.6	13.7	12.1	12.1	12.1	12.1	13.0	13.6	12.8	13.9	13.8	13.2	13.2	12.9	12.9	12.9	12.8	13.0	13.3	9.6	9.7	9.4	9.4	9.7	9.7	9.7	9.7	11.3	11.0	11.0	10.8
152	A. gasconi DQ502052	13.4	13.4	13.7	13.6	13.4	13.7	13.9	13.9	15.0	15.9	15.9	15.0	15.0	15.0	16.1	14.7	13.6	13.4	14.6	11.5	11.5	11.5	11.5	14.2	14.7	13.6	15.0	15.5	14.0	13.8	13.8	13.8	13.8	14.2	14.5	14.2	12.6	12.4	12.1	12.1	12.4	11.8	11.8	11.8	12.3	12.6	12.3	13.5
153	A. gasconi DQ502053	13.4	13.4	13.7	13.6	13.4	13.7	13.9	13.9	15.0	15.9	15.9	15.0	15.0	15.0	16.1	14.7	13.6	13.4	14.6	11.5	11.5	11.5	11.5	14.2	14.7	13.6	15.0	15.5	14.0	13.8	13.8	13.8	13.8	14.2	14.5	14.2	12.6	12.4	12.1	12.1	12.4	11.8	11.8	11.8	12.3	12.6	12.3	13.5
154	A. gasconi DQ502202	13.4	13.4	13.7	13.6	13.4	13.7	13.9	13.9	15.0	15.9	15.9	15.0	15.0	15.0	16.1	14.7	13.6	13.4	14.6	11.5	11.5	11.5	11.5	14.2	14.7	13.6	15.0	15.5	14.0	13.8	13.8	13.8	13.8	14.2	14.5	14.2	12.6	12.4	12.1	12.1	12.4	11.8	11.8	11.8	12.3	12.6	12.3	13.5
155	A. marchesianus EU342543	13.4	13.4	13.7	13.6	13.4	13.7	13.9	13.9	15.0	15.9	15.9	15.0	15.0	15.0	16.1	14.7	13.6	13.4	14.6	11.5	11.5	11.5	11.5	14.2	14.7	13.6	15.0	15.5	14.0	13.8	13.8	13.8	13.8	14.2	14.5	14.2	12.6	12.4	12.1	12.1	12.4	11.8	11.8	11.8	12.3	12.6	12.3	13.5
156	A. marchesianus EU342544	13.7	13.7	14.0	13.9	13.6	14.0	14.2	14.2	15.3	16.1	16.1	15.3	15.3	15.3	15.9	15.0	13.9	13.7	14.9	11.5	11.5	11.5	11.5	14.5	15.0	13.9	15.3	15.8	13.8	13.5	13.5	13.5	13.5	14.5	14.7	14.5	12.6	12.4	12.1	12.1	12.4	11.8	11.8	11.8	12.6	12.9	12.6	13.5
157	A. grillisimilis KF250504	16.2	16.2	15.3	15.9	15.9	16.5	16.1	16.1	16.3	16.3	16.3	16.1	16.1	16.1	16.6	16.6	15.2	15.0	17.4	13.4	13.4	13.4	13.4	15.0	15.0	13.5	15.9	15.5	14.6	14.6	14.3	14.3	14.3	17.1	16.8	17.1	13.7	14.6	14.4	14.4	14.6	14.1	14.1	14.1	12.6	12.9	13.2	12.1
158	A. grillisimilis KF250505	15.9	15.9	15.1	15.6	15.6	16.2	15.9	15.9	16.1	16.1	16.1	15.8	15.8	15.8	16.3	16.9	15.5	15.3	17.1	13.6	13.6	13.6	13.6	14.7	14.7	13.3	15.6	15.2	14.3	14.3	14.0	14.0	14.0	16.8	16.5	16.8	14.0	14.9	14.6	14.6	14.9	14.4	14.4	14.4	12.9	13.2	13.4	12.4
159	A. grillisimilis KF250506	15.1	14.8	14.0	14.2	14.2	15.4	15.1	15.1	16.4	16.4	16.4	16.7	16.7	16.7	16.7	16.7	16.4	15.9	16.3	14.5	14.5	14.5	14.5	15.4	15.4	13.9	15.9	15.8	14.9	14.9	14.9	14.9	14.9	17.4	17.1	17.4	14.6	14.7	14.4	14.4	14.7	14.7	14.7	14.7	12.9	13.2	13.5	13.0
160	A. grillicantus MPEG43051	13.9	13.6	12.8	13.0	13.0	13.9	14.2	14.2	15.3	15.3	15.3	15.3	15.3	15.3	15.0	15.0	13.6	13.4	14.9	13.1	13.1	13.1	13.1	13.3	13.6	12.2	13.9	14.1	14.0	14.1	15.2	15.2	15.2	15.1	14.8	15.7	13.2	14.6	14.4	14.4	14.6	14.6	14.6	14.6	12.9	12.6	12.9	11.2
161	A. grillicantus INPAH41354	13.9	13.6	12.8	13.0	13.0	13.9	14.2	14.2	15.3	15.3	15.3	15.3	15.3	15.3	15.0	15.0	13.6	13.4	14.9	13.1	13.1	13.1	13.1	13.3	13.6	12.2	13.9	14.1	14.0	14.1	15.2	15.2	15.2	15.1	14.8	15.7	13.2	14.6	14.4	14.4	14.6	14.6	14.6	14.6	12.9	12.6	12.9	11.2
162	A. grillicantus MPEG43042	13.9	13.6	12.8	13.0	13.0	13.9	14.2	14.2	15.0	15.3	15.3	15.0	15.0	15.0	15.0	15.0	13.6	13.1	14.9	12.8	12.8	12.8	12.8	13.3	13.6	12.2	13.9	13.5	13.8	13.8	14.9	14.9	14.9	14.2	13.9	14.8	13.4	14.4	14.6	14.6	14.9	14.9	14.9	14.9	13.4	13.2	13.4	12.1
163	A. grillicantus MPEG43039	13.9	13.6	12.8	13.0	13.0	13.9	14.2	14.2	15.0	15.3	15.3	15.0	15.0	15.0	15.0	15.0	13.6	13.1	14.8	12.8	12.8	12.8	12.8	13.6	13.9	12.4	14.2	13.5	13.8	13.8	14.9	14.9	14.9	14.5	14.2	14.7	13.4	14.4	14.6	14.6	14.9	14.9	14.9	14.9	13.4	13.2	13.4	12.1
164	A. caeruleodactylus DQ502100	12.0	12.0	12.3	12.8	12.8	11.7	12.8	12.8	14.4	15.3	15.3	14.7	14.7	14.7	15.3	15.3	13.9	14.5	14.6	12.0	12.0	12.0	12.0	10.8	11.3	10.2	11.9	11.0	9.8	9.8	10.6	10.6	10.6	12.5	12.2	12.5	12.4	11.9	12.1	12.1	12.4	11.9	11.9	11.9	12.4	12.6	13.2	12.4
165	A. caeruleodactylus DQ502141	12.8	12.8	13.1	13.6	13.6	12.5	13.6	13.6	14.4	15.3	15.3	14.7	14.7	14.7	15.3	15.3	13.9	14.5	14.0	12.9	12.9	12.9	12.9	11.3	11.9	10.8	12.5	11.5	10.3	10.4	11.2	11.2	11.2	13.1	12.8	13.1	12.9	13.0	13.3	13.3	13.6	13.0	13.0	13.0	13.5	13.8	14.3	13.0
166	A. caeruleodactylus DQ502186	12.8	12.8	13.1	13.6	13.6	12.5	13.6	13.6	14.4	15.3	15.3	14.7	14.7	14.7	15.3	15.3	13.9	14.5	14.0	12.9	12.9	12.9	12.9	11.3	11.9	10.8	12.5	11.5	10.3	10.4	11.2	11.2	11.2	13.1	12.8	13.1	12.9	13.0	13.3	13.3	13.6	13.0	13.0	13.0	13.5	13.8	14.3	13.0
167	A. aff. marchesianus AY263233	12.8	12.5	12.3	12.8	12.8	13.4	13.4	13.4	13.6	13.9	13.9	13.9	13.9	13.9	13.9	13.6	11.9	11.7	14.9	10.9	10.9	10.9	10.9	13.9	14.5	13.3	14.8	13.0	11.8	11.8	10.9	10.9	10.9	13.9	14.2	13.6	11.2	11.9	11.9	11.9	11.6	12.1	12.1	12.1	12.9	13.2	13.2	11.3
168	A. granti EU201067	12.8	12.5	12.3	12.8	12.8	13.4	13.4	13.4	13.6	13.9	13.9	13.9	13.9	13.9	13.9	13.6	11.9	11.7	14.9	10.9	10.9	10.9	10.9	13.9	14.5	13.3	14.8	13.0	11.8	11.8	10.9	10.9	10.9	13.9	14.2	13.6	11.2	11.9	11.9	11.9	11.6	12.1	12.1	12.1	12.9	13.2	13.2	11.3
169	A. granti EU201066	13.7	13.4	13.1	13.6	13.6	13.7	14.2	14.2	13.6	13.9	13.9	13.9	13.9	13.9	13.9	14.2	12.5	12.3	15.1	10.9	10.9	10.9	10.9	14.8	15.4	14.2	15.7	13.8	12.6	12.7	11.8	11.8	11.8	14.8	15.1	14.5	11.0	11.6	11.6	11.6	11.3	11.9	11.9	11.9	13.2	13.5	13.5	12.1
170	A. granti EU201068	11.7	11.4	10.8	11.4	11.4	12.5	12.2	12.2	14.4	14.7	14.7	14.4	14.4	14.4	14.2	14.7	13.3	12.5	15.7	12.0	12.0	12.0	12.0	13.9	14.5	13.9	14.8	13.3	12.1	12.1	11.8	11.8	11.8	13.6	13.9	13.6	11.5	11.0	11.0	11.0	10.7	11.3	11.3	11.3	13.5	13.2	13.8	12.4
171	A. algorei HQ290950	12.5	12.3	12.3	12.8	12.8	13.1	13.6	13.6	14.2	14.7	14.7	12.7	12.7	12.7	14.4	12.7	13.3	12.0	12.9	11.2	11.2	11.2	11.2	13.6	14.2	12.8	13.9	14.4	12.3	12.4	13.5	13.5	13.5	13.6	13.6	13.9	14.3	13.2	13.2	13.2	13.0	13.5	13.5	13.5	14.0	14.3	14.3	13.5
172	A. algorei MK369818	12.8	12.5	12.5	13.1	13.1	13.4	13.9	13.9	14.4	15.0	15.0	13.0	13.0	13.0	14.7	13.0	13.6	12.3	13.2	10.9	10.9	10.9	10.9	13.3	13.9	12.5	13.6	14.1	12.0	12.1	13.2	13.2	13.2	13.3	13.3	13.6	14.0	13.0	13.0	13.0	12.7	13.2	13.2	13.2	13.7	14.0	14.0	13.2
173	A. algorei MK369819	12.8	12.5	12.5	13.1	13.1	13.4	13.9	13.9	14.4	15.0	15.0	13.0	13.0	13.0	14.7	13.0	13.6	12.3	13.2	10.9	10.9	10.9	10.9	13.3	13.9	12.5	13.6	14.1	12.0	12.1	13.2	13.2	13.2	13.3	13.3	13.6	14.0	13.0	13.0	13.0	12.7	13.2	13.2	13.2	13.7	14.0	14.0	13.2
174	A. sp. n. MT076998	14.6	14.6	14.6	14.8	14.8	14.9	15.7	15.7	15.9	15.6	15.6	15.3	15.3	15.3	16.4	16.1	15.0	15.1	16.3	15.4	15.4	15.4	15.4	12.5	13.0	13.0	13.3	13.2	14.0	14.1	13.8	13.8	13.8	13.0	13.3	13.0	11.0	10.7	11.0	11.0	11.3	10.7	10.7	10.7	12.7	12.4	13.0	13.0
175	A. sp. n. MT076999	14.9	14.9	14.9	15.1	15.1	15.1	16.0	16.0	16.1	15.9	15.9	15.3	15.3	15.3	16.4	16.4	15.0	15.1	16.6	15.2	15.2	15.2	15.2	12.8	13.3	12.8	13.6	13.5	13.8	13.8	14.0	14.0	14.0	13.3	13.6	13.3	10.7	10.5	10.7	10.7	11.0	10.5	10.5	10.5	12.4	12.1	12.7	12.7
176	A. sp. n. MT077000	14.9	14.9	14.9	15.1	15.1	15.1	16.0	16.0	16.1	15.9	15.9	15.3	15.3	15.3	16.4	16.4	15.0	15.1	16.6	15.2	15.2	15.2	15.2	12.8	13.3	12.8	13.6	13.5	13.8	13.8	14.0	14.0	14.0	13.3	13.6	13.3	10.7	10.5	10.7	10.7	11.0	10.5	10.5	10.5	12.4	12.1	12.7	12.7
177	A. undulatus DQ283044	15.4	15.1	15.7	15.6	15.9	16.5	15.9	15.9	15.8	15.5	15.5	16.9	16.9	16.9	16.7	17.2	16.7	16.8	17.1	17.0	17.0	17.0	17.0	14.5	15.0	14.2	15.3	15.8	14.9	14.9	14.9	14.9	14.9	15.0	15.3	14.5	13.7	14.4	14.1	14.1	14.4	14.4	14.4	14.4	15.7	15.4	15.1	13.8
178	A. undulatus DQ502029	15.4	15.1	15.7	15.6	15.9	16.5	15.9	15.9	15.8	15.5	15.5	16.9	16.9	16.9	16.7	17.2	16.7	16.8	17.1	17.0	17.0	17.0	17.0	14.5	15.0	14.2	15.3	15.8	14.9	14.9	14.9	14.9	14.9	15.0	15.3	14.5	13.7	14.4	14.1	14.1	14.4	14.4	14.4	14.4	15.7	15.4	15.1	13.8
179	A. undulatus DQ502028	15.1	14.8	15.4	15.3	15.6	16.2	16.2	16.2	15.8	15.5	15.5	16.9	16.9	16.9	16.7	17.2	16.7	16.8	17.1	16.8	16.8	16.8	16.8	14.7	15.3	14.5	15.6	16.0	15.1	15.2	15.1	15.1	15.1	15.3	15.6	14.7	14.0	14.1	13.8	13.8	14.1	14.1	14.1	14.1	15.4	15.1	14.8	14.0
180	A. paleci sp. nov. CHUFPB30253_OK349681	14.0	14.2	14.5	15.1	15.1	15.4	15.1	15.1	16.1	15.3	15.3	15.9	15.9	15.9	16.1	16.7	14.4	14.5	16.9	14.6	14.6	14.6	14.6	13.8	13.8	12.7	14.7	13.5	12.6	12.6	12.3	12.3	12.3	15.0	15.3	14.7	13.2	13.8	14.1	14.1	14.4	14.1	14.1	14.1	14.6	14.8	14.8	12.4
181	A. sp. neblina MT627201	14.2	14.2	13.9	14.2	14.5	14.5	14.5	14.5	17.6	18.2	18.2	17.9	17.9	17.9	17.1	17.3	16.5	16.8	16.8	14.5	14.5	14.5	14.5	12.9	13.2	13.2	14.1	14.0	14.5	14.5	13.3	13.3	13.3	15.0	15.0	14.4	12.7	13.4	13.4	13.4	13.4	13.1	13.1	13.1	15.0	14.7	15.9	15.7
182	A. olfersioides DQ502126	18.4	18.1	17.3	17.3	17.3	18.4	18.1	18.1	19.0	19.2	19.2	18.7	18.7	18.7	19.2	18.7	18.3	18.4	20.4	20.1	20.1	20.1	20.1	17.2	17.4	17.2	17.7	16.6	16.4	16.4	16.7	16.7	16.7	17.2	16.9	18.0	19.0	19.1	18.8	18.8	19.1	19.1	19.1	19.1	19.9	19.6	20.2	17.6
183	A. olfersioides MF624178	16.8	16.5	16.2	16.4	16.4	17.1	16.4	16.4	18.1	17.5	17.5	17.5	17.5	17.5	17.2	16.1	16.6	16.7	16.7	17.2	17.2	17.2	17.2	15.4	15.1	14.8	15.4	15.0	14.4	14.5	14.7	14.7	14.7	15.7	15.7	15.4	15.6	15.7	15.4	15.4	15.7	15.7	15.7	15.7	15.9	15.6	16.1	14.2
184	A. olfersioides MF624179	16.8	16.5	16.2	16.4	16.4	17.1	16.4	16.4	18.1	17.5	17.5	17.5	17.5	17.5	17.2	16.1	16.6	16.7	16.7	17.2	17.2	17.2	17.2	15.4	15.1	14.8	15.4	15.0	14.4	14.5	14.7	14.7	14.7	15.7	15.7	15.4	15.6	15.7	15.4	15.4	15.7	15.7	15.7	15.7	15.9	15.6	16.1	14.2
185	A. cf. zaparo DQ502013	20.6	20.3	20.3	20.5	20.5	21.4	20.2	20.2	19.6	19.9	19.9	19.9	19.9	19.9	19.3	18.5	18.5	17.7	19.3	19.7	19.7	19.7	19.7	18.3	18.6	18.3	18.9	18.4	17.5	17.3	18.1	18.1	18.1	19.7	19.4	19.7	19.1	20.1	19.8	19.8	19.5	20.1	20.1	20.1	20.5	20.2	20.5	18.3
186	A. ranoides EU342692	19.7	19.7	19.7	19.9	19.9	19.7	19.9	19.9	20.4	20.7	20.7	20.1	20.1	20.1	20.4	20.4	19.3	19.4	20.3	18.5	18.5	18.5	18.5	17.7	18.0	18.0	19.1	18.4	18.6	18.7	19.5	19.5	19.5	19.7	19.4	19.7	18.8	18.0	18.3	18.3	18.0	18.0	18.0	18.0	19.6	19.3	20.4	17.4
[truncated: 138 more columns]
